# Supplementary material for: Drosophila oocyte proteome composition covaries with female mating status
Source: PubMed Central journal article supplement (PMC7862673; doi:10.1038/s41598-021-82801-4), 2021-02-04

Fig S1

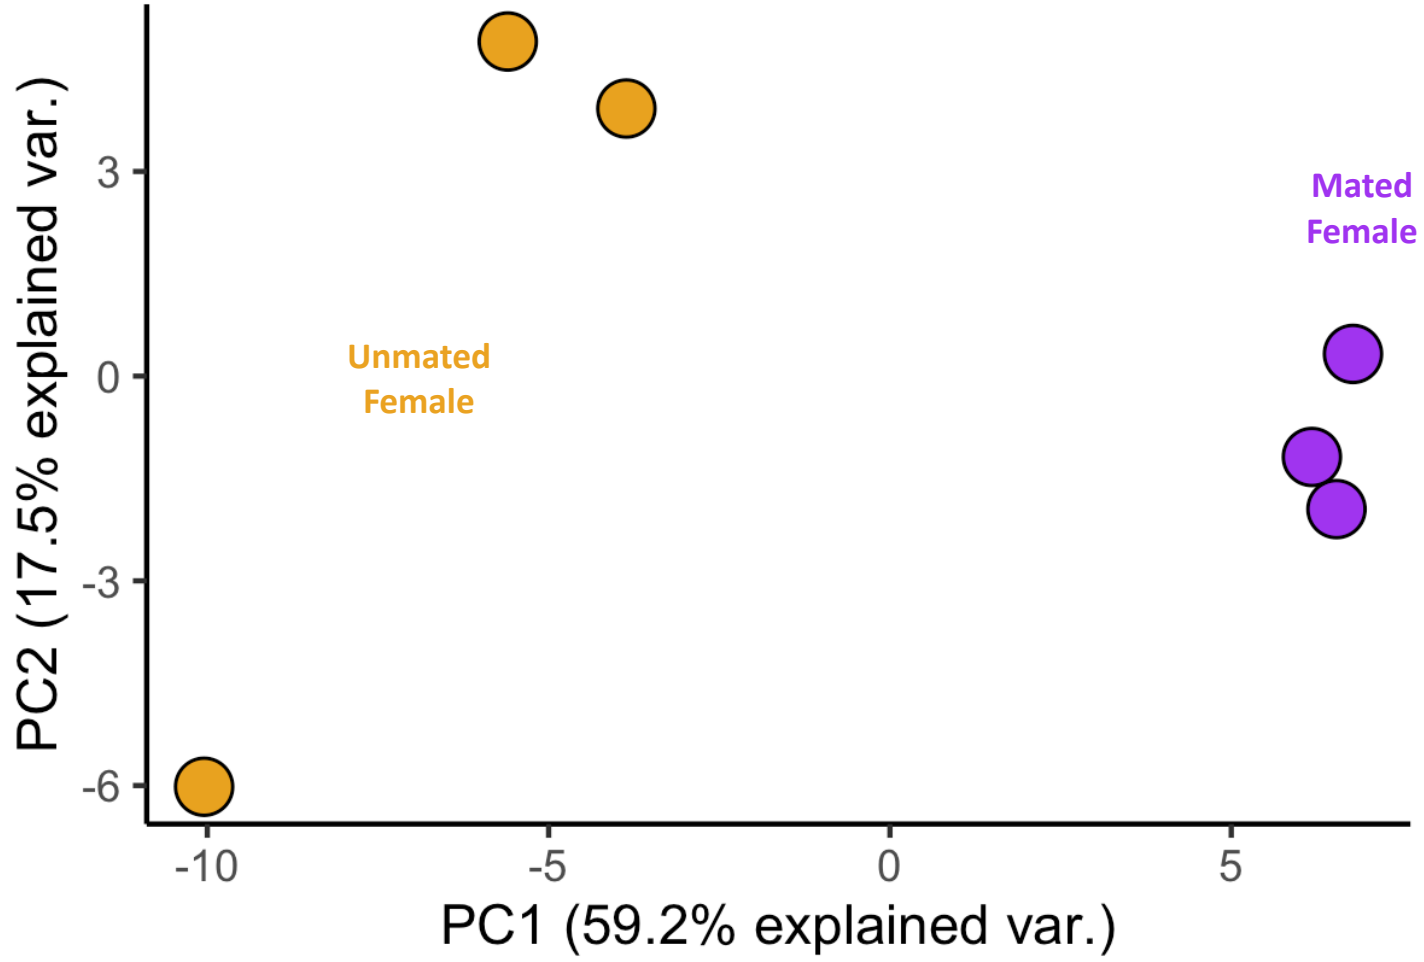

Fig S2

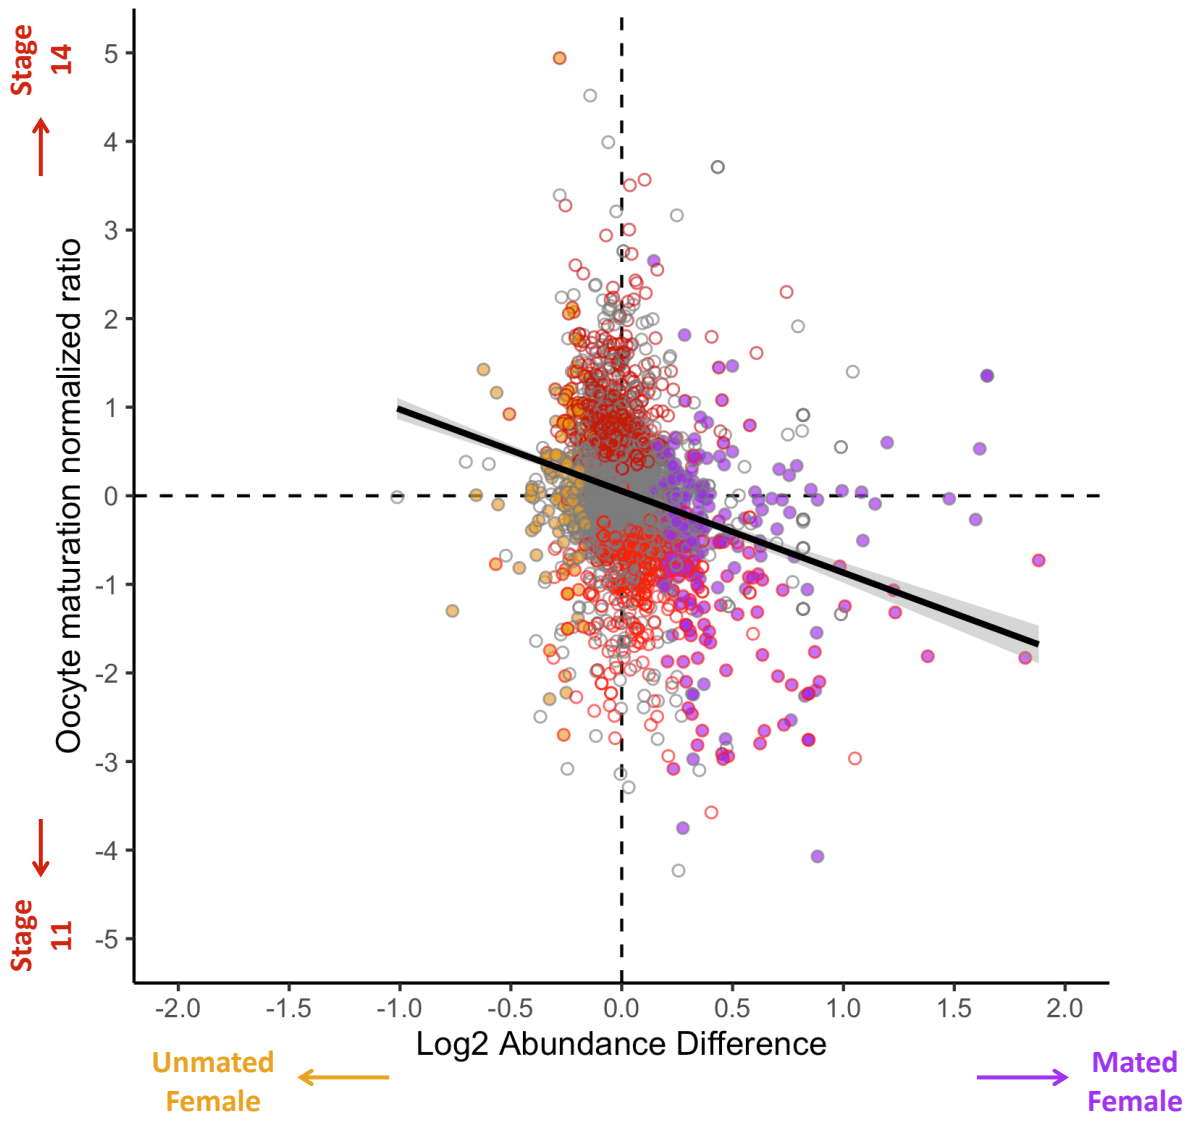

Supplement: 41598_2021_82801_MOESM1_ESM.pdf [file 41598_2021_82801_MOESM1_ESM.pdf]
